# Supplementary material for: Effects of Growth Stage on the Characterization of Enterotoxin A-Producing Staphylococcus aureus-Derived Membrane Vesicles
Source: MDPI journal article supplement (doi:10.3390/microorganisms10030574), 2022-03-06
Supplement: s1 [file s1]

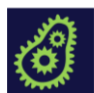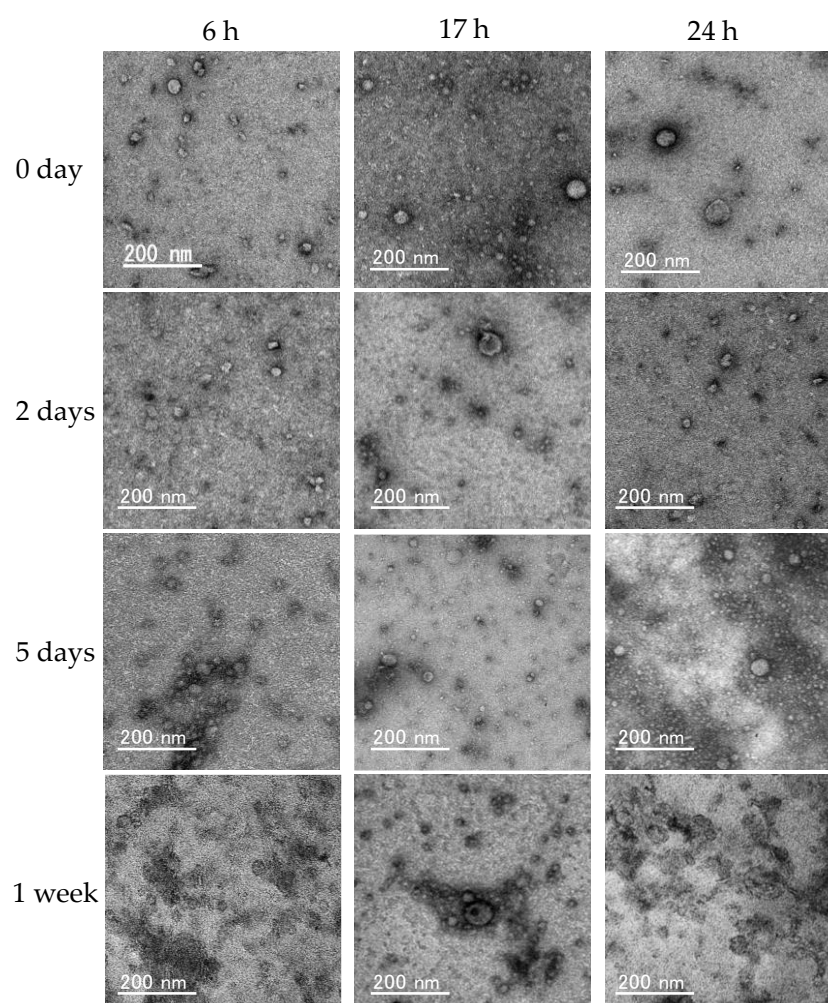

**Figure S1.** TEM images of MVs stored at 23°C for 2, 5 days, and 1 week. MVs prepared from culture supernatants after incubation for 6, 17, and 24 h.

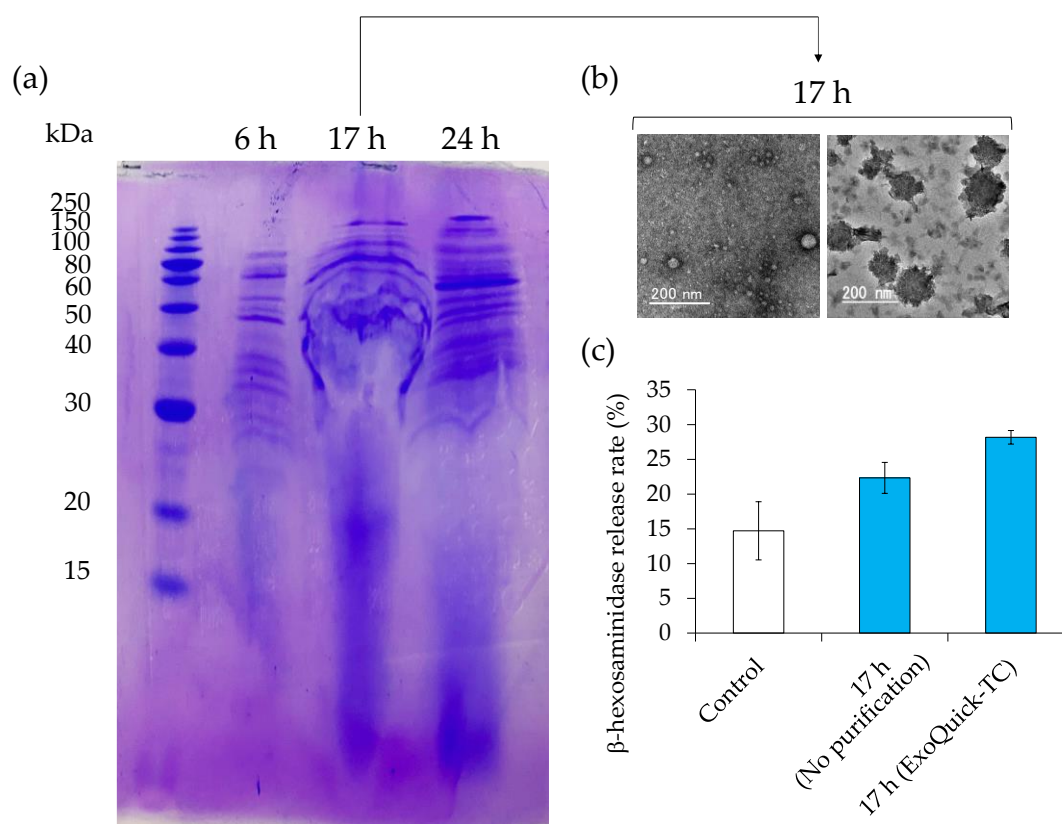

**Figure S2.** Cargo proteins in MV prepared using MVs-precipitation reagent (ExoQuick-TC). (a) MVs prepared from culture supernatants after incubation for 6, 17, and 24 h was analyzed by SDS-PAGE. (b) TEM images of MVs prepared using ExoQuick-TC from culture supernatants after incubation for 17 h. (c)  $\beta$ -Hexosaminidase release induced by MVs prepared using ExoQuick-TC.
